# Supplementary material for: Global burden of mental disorders in 204 countries and territories, 1990 - 2021: results from the global burden of disease study 2021
Source: Research Square preprint supplement (doi:10.21203/rs.3.rs-5982161/v1), 2025-03-27
Supplement: Supplementary file 1 [file 5ecbac263eaa2b1432a9c8ea.docx]

**Table S1. List of International Classification of Diseases 10 (ICD-10) and Diagnostic and Statistical Manual of Mental Disorders IV (DSM-IV) codes mapped to mental disorders in GBD 2021**

| **Cause** | **ICD-10** | **DSM-IV-TR** |
| --- | --- | --- |
| Anxiety disorders | F40-42, F43.0, F43.1, F93.0-93.2, F93.8 | 300.0-300.3, 208.3, 309.21, 309.81 |
| Major depressive disorder | F32.0-9, F33.0-9 | 296.21-24, 296.31-34 |
| Schizophrenia | F20 | 295.10-295.30, 295.60, 295.90 |
| Bipolar disorder | F30.0-F30.9, F31.0-F31.6, F31.8-F31.9, F34.0 | 296.0-296.7, 296.89, 301.13 |
| Dysthymia | F34.1 | 300.4 |
| Anorexia nervosa | F50.0-50.1 | 307.1 |
| Bulimia nervosa | F50.2 | 307.51 |
| Autism spectrum disorders | F84.0, F84.1, F84.2, F84.3, F84.4, F84.5, F84.8, F84.9 | 299.00, 299.80, 299.8, 299.8, 299.10 |
| Attention-deficit/hyperactivity disorder | F90 | 314.0, 314.01 |
| Conduct disorder | F91 | 312.81-312.89 |
| Idiopathic developmental intellectual disability | F70-F79.9, F80-F89, Z81.0 | 317, 318.0, 318.1, 318.2, 319  Involves borderline (lQ Score 70-85), mild (lQ score 50-69), moderate (lQ Score 35-49) , severe (lQ score 20-34), andprofound (lQ score 0-19) idiopathic intellectual disability |
| Other mental disorders | F60 | 300.3, 301.0; 301.2, 301.22, 301.5-301.9 |
