# Supplementary material for: Global burden of mental disorders in 204 countries and territories, 1990 - 2021: results from the global burden of disease study 2021
Source: Research Square preprint supplement (doi:10.21203/rs.3.rs-5982161/v1), 2025-03-27
Supplement: Supplementary file 2 [file 90829877f7545804aa5034f4.docx]

Figure 1

library(readr)

gbd_data <- read_csv("E:/mental disorder/IHME-GBD_2021_DATA-map.csv")

install.packages(c("ggplot2", "sf", "rnaturalearth", "rnaturalearthdata", "dplyr"))

library(ggplot2)

library(sf)

library(rnaturalearth)

library(rnaturalearthdata)

library(dplyr)

world_map <- ne_countries(scale = "medium", returnclass = "sf")

library(countrycode)

gbd_data$iso3c<-countrycode(gbd_data $location_name, "country.name", "iso3c")

merged_data <- world_map %>%

left_join(gbd_data, by = c("iso_a3" = "iso3c"))

head(gbd_data)

gbd_data <- gbd_data %>% filter(metric_name == "Rate")

incidence_data <- gbd_data %>% filter(measure_name == "Incidence")

DALYs_data <- gbd_data %>% filter(measure_name == "DALYs (Disability-Adjusted Life Years)")

ggplot(incidence_data) +

geom_sf(aes(fill = Incidence_Rate_Label)) +

scale_fill_gradient(low = "lightblue", high = "darkred") +

theme_minimal() +

theme(

legend.position = "left",

legend.direction = "vertical",

legend.title = element_text(size = 7),

legend.text = element_text(size = 6),

axis.text.x = element_blank(),

axis.ticks.x = element_blank(),

panel.grid.major = element_blank(),

panel.grid.minor = element_blank(),

panel.border = element_blank()

) +

labs(fill = "Incidence")

ggplot(DALYs_data) +

geom_sf(aes(fill = DALYs_Rate_Label)) +

scale_fill_gradient(low = "lightblue", high = "darkred") +

theme_minimal() +

theme(

legend.position = "left",

legend.direction = "vertical",

legend.title = element_text(size = 7),

legend.text = element_text(size = 6),

axis.text.x = element_blank(),

axis.ticks.x = element_blank(),

panel.grid.major = element_blank(),

panel.grid.minor = element_blank(),

panel.border = element_blank()

) +

labs(fill = "DALYs")

##################

Table 3:AAPC

library(dplyr)

library(readr)

library(tidyr)

library(broom)

library(ggplot2)

data<-read_csv("E:/mental disorder/IHME-GBD_2021_DATA /IHME-GBD_2021_DATA subtypes.csv")

ASR_data <- data %>%

filter(measure_name == "DALYs (Disability-Adjusted Life Years)") %>%

rename(ASDR = rate)

combined_data <- ASR_data

calculate_aapc <- function(data, rate_column) {

if (nrow(data) < 2) {

return(list(AAPC = NA, CI_lower = NA, CI_upper = NA))

}

model <- lm(log(data[[rate_column]]) ~ year, data = data)

tidy_model <- tidy(model, conf.int = TRUE)

aapc <- 100 * (exp(tidy_model$estimate[2]) - 1)

ci_lower <- 100 * (exp(tidy_model$conf.low[2]) - 1)

ci_upper <- 100 * (exp(tidy_model$conf.high[2]) - 1)

aapc_str <- paste0(round(aapc, 1), " (", round(ci_lower, 1), " to ", round(ci_upper, 1), ")")

return(list(AAPC = aapc_str))

}

aapc_results <- combined_data %>%

group_by(location_id, location_name) %>%

summarize(

ASR_AAPC = calculate_aapc(cur_data(), "ASDR")$AAPC)

##################

Figure 2

library(dplyr)

library(ggplot2)

gbd_data <- gbd_data %>% filter(metric_name == "Rate")

incidence_data <- gbd_data %>% filter(measure_name == "Incidence")

DALY_data <- gbd_data %>% filter(measure_name == "DALYs (Disability-Adjusted Life Years)")

incidence_data <- incidence_data %>%

group_by(location_name) %>%

arrange(location_name, desc(val)) %>%

mutate(rank = rank(-val))

custom_order <- c(

"Global",

"High-income Asia Pacific",

"High-income North America",

"Western Europe",

"Australasia",

"Andean Latin America",

"Tropical Latin America",

"Central Latin America",

"Southern Latin America",

"Caribbean",

"Central Europe",

"Eastern Europe",

"Central Asia",

"North Africa and Middle East",

"South Asia",

"Southeast Asia",

"East Asia",

"Oceania",

"Western Sub-Saharan Africa",

"Eastern Sub-Saharan Africa",

"Central Sub-Saharan Africa",

"Southern Sub-Saharan Africa"

)

incidence_data$location_name <- factor (incidence_data$location_name, levels = custom_order)

ggplot(incidence_data, aes(x = location_name, y = cause_name)) +

geom_tile(aes(fill = val), color = "white") +

scale_fill_gradient(low = "white", high = "red") +

theme_minimal() +

labs(

x = "location_name",

y = "cause_name",

fill = "val"

) +

theme(axis.text.x = element_text(angle = 45, hjust = 1)) +

theme(axis.text.y = element_text(size = 8)) +

geom_text(aes(label = rank), color = "black", size = 3)

DALY_data <- DALY_data %>%

group_by(location_name) %>%

arrange(location_name, desc(val)) %>%

mutate(rank = rank(-val))

custom_order <- c(

"Global",

"High-income Asia Pacific",

"High-income North America",

"Western Europe",

"Australasia",

"Andean Latin America",

"Tropical Latin America",

"Central Latin America",

"Southern Latin America",

"Caribbean",

"Central Europe",

"Eastern Europe",

"Central Asia",

"North Africa and Middle East",

"South Asia",

"Southeast Asia",

"East Asia",

"Oceania",

"Western Sub-Saharan Africa",

"Eastern Sub-Saharan Africa",

"Central Sub-Saharan Africa",

"Southern Sub-Saharan Africa"

)

DALY_data$location_name <- factor (DALY_data$location_name, levels = custom_order)

ggplot(DALY_data, aes(x = location_name, y = cause_name)) +

geom_tile(aes(fill = val), color = "white") +

scale_fill_gradient(low = "white", high = "red") +

theme_minimal() +

labs(

x = "location_name",

y = "cause_name",

fill = "val"

) +

theme(axis.text.x = element_text(angle = 45, hjust = 1)) +

theme(axis.text.y = element_text(size = 8)) +

geom_text(aes(label = rank), color = "black", size = 3)

##################

Figure 3

gbd_data <- read_csv("E:/mental disorder/IHME-GBD_2021_DATA-3b5c7e91-1.csv")

sdi_data <- read_csv("D:/gbd/SDI_1950_2021.csv")

gbd_data <- gbd_data %>% filter(metric_name == "Rate")

incidence_data <- gbd_data %>% filter(measure_name == "Incidence")

DALY_data <- gbd_data %>% filter(measure_name == "DALYs (Disability-Adjusted Life Years)")

library(ggplot2)

combined_data <- merge(sdi_data, incidence_data, by = c('location_name', 'year'))

ggplot(combined_data, aes(x = mean_value, y = total_value)) +

geom_point(aes(color = location_name, shape = location_name)) +

scale_shape_manual(values = 1:22) +

geom_smooth(method = "loess", color = "lightblue", se = TRUE, fill = "gray", alpha = 0.2) +

xlab(NULL) +

ylab("ASIR") +

theme(

panel.grid.major = element_blank(),

panel.grid.minor = element_blank(),

panel.background = element_blank(),

axis.line = element_line(color = "black"),

legend.text = element_text(size = 6),

legend.title = element_text(size = 8)

) +

guides(

color = guide_legend(ncol = 1, keyheight = 0.5),

shape = guide_legend(ncol = 1, keyheight = 0.5))

library(ggplot2)

combined_data <- merge(sdi_data, DALYs_data, by = c('location_name', 'year'))

ggplot(combined_data, aes(x = mean_value, y = total_value)) +

geom_point(aes(color = location_name, shape = location_name)) +

scale_shape_manual(values = 1:22) +

geom_smooth(method = "loess", color = "lightblue", se = TRUE, fill = "gray", alpha = 0.2) +

xlab(NULL) +

ylab("ASR") +

theme(

panel.grid.major = element_blank(),

panel.grid.minor = element_blank(),

panel.background = element_blank(),

axis.line = element_line(color = "black"),

legend.text = element_text(size = 6),

legend.title = element_text(size = 8)

) +

guides(

color = guide_legend(ncol = 1, keyheight = 0.5),

shape = guide_legend(ncol = 1, keyheight = 0.5))
